# Supplementary material
Source: publisher figshare collection journal article supplement (https://tandf.figshare.com/articles/dataset/_/1153754)
Supplement: Supplementary file 1 [file 2]

Archive with 3 entries (3 files):
- tnzr_a_944192_sm3548.docx
- tnzr_a_944192_sm3544.xlsx
- tnzr_a_944192_sm3543.pdf
