# Supplementary material
Source: publisher figshare collection journal article supplement (https://tandf.figshare.com/articles/dataset/_/1153754)
Supplement: Supplementary file 1 [file 2 › tnzr_a_944192_sm3544.xlsx]

## Sheet: Q1-5
	n	NR
Q1				<10	11-20	21-30	31-40	>40		<10	11-20	21-30	31-40	>40
1994	787	72		0.12	0.39	0.2	0.1	0.19		94.44	306.93	157.4	78.7	149.53
2012	763	38		0.0996068	0.366972	0.188729	0.14941	0.195282		76	280	144	114	149
Q2				DOC	MAF	AHB	Council	Deer	F&B	DK		DOC	MAF	AHB	Council	Deer	F&B	DK
1994	859	0		0.7	0.54	0.09	0.25	0.14	0.2	0.06		601.3	463.86	77.31	214.75	120.26	171.8	51.54
2012	790	11		0.855696	0.51519	0.181013	0.410127	0.153165	0.321519	0.0367089		676	407	143	324	121	254	29
Q3				yes	no		yes	no
1994	837	22		0.76	0.24		636.12	200.88
2012	795	6		0.743396	0.256604		591	204
Q4				Wasps	Possum	Goats	Deer	Pigs	Chamois/Thar		Wasps	Possum	Goats	Deer	Pigs	Chamois/Thar
1994	639	220		0.68	0.6	0.3	0.27	0.14	0.05		434.52	383.4	191.7	172.53	89.46	31.95
2012	466	335		0.755365	0.562232	0.375536	0.304721	0.236052	0.0643777		352	262	175	142	110	30
Q5	44-436	423-815			Add	Neither	Detract		Add	Neither	Detract
1994	436	423		Wasps	0.005	0.085	0.91		2.18	37.06	396.76
	308	551		Possum	0.137	0.299	0.564		42.196	92.092	173.712
	209	650		Goat	0.419	0.261	0.32		87.571	54.549	66.88
	131	728		Pig	0.64	0.138	0.222		83.84	18.078	29.082
	44	815		Chamois	0.752	0.159	0.089		33.088	6.996	3.916
	177	682		Deer	0.85	0.1	0.05		150.45	17.7	8.85
2012	362	439		Wasps	0.00828729	0.196133	0.79558		3	71	288											0.00216126	0.145299	0.0143867
	265	536		Possum	0.090566	0.324528	0.584906		24	86	155											0.0157381	0.00217958	0.000774905
	190	611		Goat	0.421053	0.378947	0.2		80	72	38											1.00556e-05	0.0533011	0.045
	131	670		Pig	0.503817	0.290076	0.206107		66	38	27											0.0289779	0.167588	0.0011378
	65	736		Chamois	0.6	0.292308	0.107692		39	19	7											0.0307234	0.111767	0.00392587
	166	635		Deer	0.819277	0.156627	0.0240964		136	26	4											0.00111047	0.0320656	0.0134199

## Sheet: Q6-8
	n	NR
Q6	817-843	16-42			Pest	Both	Resource	DK		Pest	Both	Resource	DK
1994	843	16		Rodents	0.94	0.035	0.01	0.015		792.42	29.505	8.43	12.645
	841	18		Wasps	0.9	0.05	0.02	0.03		756.9	42.05	16.82	25.23
	837	22		Cats	0.855	0.055	0.015	0.075		715.635	46.035	12.555	62.775
	829	30		Possums	0.845	0.135	0.015	0.005		700.505	111.915	12.435	4.145
	838	21		Rabbits	0.765	0.185	0.04	0.01		641.07	155.03	33.52	8.38
	832	27		Mustelids	0.75	0.14	0.035	0.075		624	116.48	29.12	62.4
	820	39		Hares	0.71	0.155	0.07	0.065		582.2	127.1	57.4	53.3
	826	33		Wallabies	0.43	0.2	0.145	0.225		355.18	165.2	119.77	185.85
	831	28		Goat	0.275	0.445	0.26	0.02		228.525	369.795	216.06	16.62
	829	30		Pigs	0.21	0.435	0.32	0.035		174.09	360.615	265.28	29.015
	828	31		Horses	0.125	0.37	0.35	0.155		103.5	306.36	289.8	128.34
	817	42		Thar	0.105	0.235	0.33	0.33		85.785	191.995	269.61	269.61
	828	31		Chamois	0.1	0.255	0.365	0.28		82.8	211.14	302.22	231.84
	826	33		Deer	0.045	0.505	0.445	0.005		37.17	417.13	367.57	4.13
2012	794	7		Rodents	0.960957	0.0251889	0.00503778	0.00881612		763	20	4	7
	793	8		Wasps	0.844893	0.0769231	0.0390921	0.0390921		670	61	31	31
	790	11		Cats	0.932911	0.0240506	0.0202532	0.0227848		737	19	16	18
	785	16		Possums	0.8	0.173248	0.0216561	0.00509554		628	136	17	4
	791	10		Rabbits	0.76359	0.17952	0.0480405	0.00884956		604	142	38	7
	787	14		Mustelids	0.884371	0.0393901	0.0139771	0.0622618		696	31	11	49
	779	22		Hares	0.744544	0.154044	0.0539153	0.0474968		580	120	42	37
	783	18		Wallabies	0.507024	0.172414	0.139208	0.181354		397	135	109	142
	786	15		Goat	0.254453	0.447837	0.270992	0.0267176		200	352	213	21
	785	16		Pigs	0.146497	0.48535	0.351592	0.0165605		115	381	276	13
	784	17		Horses	0.232143	0.360969	0.266582	0.140306		182	283	209	110
	777	24		Thar	0.163449	0.277992	0.236808	0.32175		127	216	184	250
	784	17		Chamois	0.153061	0.272959	0.258929	0.315051		120	214	203	247
	783	18		Deer	0.0651341	0.491699	0.427842	0.0153257		51	385	335	12
Q7				yes	no		yes	no
	1994			NA	NA
	2012	753	48	0.463479	0.536521		349	404
Q8	814-825	34-45			Enjoy	DK	Unenjoy		Enjoy	DK	Unenjoy
1994	823	36		Wasps	0.025	0.025	0.95		20.575	20.575	781.85
	814	45		Rodents	0.045	0.03	0.925		36.63	24.42	752.95
	819	40		Cats	0.125	0.085	0.79		102.375	69.615	647.01
	816	43		Mustelids	0.205	0.09	0.705		167.28	73.44	575.28
	820	39		Possums	0.215	0.055	0.73		176.3	45.1	598.6
	822	37		Rabbits	0.355	0.045	0.6		291.81	36.99	493.2
	820	39		Hares	0.41	0.075	0.515		336.2	61.5	422.3
	819	40		Pigs	0.455	0.09	0.455		372.645	73.71	372.645
	817	42		Goats	0.54	0.09	0.37		441.18	73.53	302.29
	820	39		Wallabies	0.655	0.105	0.24		537.1	86.1	196.8
	817	42		Thar	0.705	0.225	0.07		575.985	183.825	57.19
	818	41		Chamois	0.75	0.185	0.065		613.5	151.33	53.17
	822	37		Horses	0.8	0.085	0.115		657.6	69.87	94.53
	825	34		Deer	0.94	0.02	0.04		775.5	16.5	33
2012	747	54		Wasps	0.0414993	0.0334672	0.925033		31	25	691
	732	69		Rodents	0.0409836	0.010929	0.948087		30	8	694
	741	60		Cats	0.0958165	0.0458839	0.8583		71	34	636
	736	65		Mustelids	0.111413	0.044837	0.84375		82	33	621
	743	58		Possums	0.181696	0.0524899	0.765814		135	39	569
	746	55		Rabbits	0.364611	0.0549598	0.580429		272	41	433
	743	58		Hares	0.397039	0.0740242	0.528937		295	55	393
	740	61		Pigs	0.55	0.0716216	0.378378		407	53	280
	738	63		Goats	0.617886	0.0691057	0.313008		456	51	231
	742	59		Wallabies	0.614555	0.0956873	0.289757		456	71	215
	738	63		Thar	0.628726	0.247967	0.123306		464	183	91
	739	62		Chamois	0.654939	0.239513	0.105548		484	177	78
	746	55		Horses	0.746649	0.0871314	0.16622		557	65	124
	751	50		Deer	0.924101	0.0213049	0.0545939		694	16	41

## Sheet: Q9-14
	n	NR
Q9					yes	no	DK
1994	843	16		M	173	209	56
				F	99	206	100
2012	746	46		M	136	156	65
				F	101	203	85
Q10					yes	no	DK
1994	839	20		M	217	150	69
				F	139	225	42
2012	781	11		M	207	93	79
				F	172	109	121
Q11					yes	no	DK
1994	835	24		M	73	291	70
				F	51	254	96
2012	774	18		M	88	202	83
				F	92	188	121
Q12				deer	thar	goat	possum	rabbit	wasp	predator	other	also
1994	777	82		8.07	6.71	9.17	25.54	22.24	16.51	NA	11.75	rodents (43), mustelids (30), cats (24), pigs (2), horses (2), hares (2), wallabies (1), predators (1)
2012	638	163		5.37944	3.67254	5.84065	25.8034	18.9479	15.1352	23.6319	1.68299	cat (25), pigs (10), intro fish (5), mustelids (3), horses (3), wallabies (3), dogs (3), intro birds (3), ants (1), plants (1), mice (1), mosquito (1)
Q13					yes	no	DK
1994	847	12		M	146	272	23
				F	139	225	42
2012	782	10		M	108	239	33
				F	106	248	48
Q14				never	x	DK		mean	median	min	max
1994	843	16		381	253	209		200	100	1	10000
2012	784	17		360	222	204		295	100	2	10000

## Sheet: Q15-17
	n	NR
Q15	827-840	19-32			Exterminate	Control	Resource	Nothing	DK		Exterminate	Control	Resource	Nothing	DK
1994	840	19		Possums	0.71	0.21	0.065	0.005	0.01		596.4	176.4	54.6	4.2	8.4
	832	27		Rabbits	0.615	0.265	0.11	0.005	0.005		511.68	220.48	91.52	4.16	4.16
	827	32		Wallabies	0.26	0.39	0.19	0.03	0.13		215.02	322.53	157.13	24.81	107.51
	838	21		Goats	0.15	0.355	0.465	0.015	0.015		125.7	297.49	389.67	12.57	12.57
	832	27		Pigs	0.095	0.31	0.535	0.045	0.015		79.04	258.207	445.12	37.44	12.48
	829	30		Thar	0.045	0.25	0.465	0.05	0.19		37.305	207.25	385.485	41.45	157.51
	829	30		Chamois	0.035	0.24	0.51	0.045	0.17		29.015	198.96	422.79	37.305	140.93
	838	21		Deer	0.025	0.14	0.81	0.025	0		20.95	117.32	678.78	20.95	0
	827	32		Mustelids	NA	NA	NA	NA	NA		NA	NA	NA	NA	NA
	840	19		Rodents	NA	NA	NA	NA	NA		NA	NA	NA	NA	NA
2012	751	50		Possums	0.685752	0.219707	0.0785619	0.0106525	0.00532623		515	165	59	8	4
	746	55		Rabbits	0.550938	0.36193	0.0670241	0.0147453	0.00536193		411	270	50	11	4
	743	58		Wallabies	0.243607	0.419919	0.195155	0.0403769	0.100942		181	312	145	30	75
	750	51		Goats	0.0853333	0.34	0.524	0.032	0.0186667		64	255	393	24	14
	746	55		Pigs	0.0563003	0.274799	0.612601	0.0375335	0.0187668		42	205	457	28	14
	744	57		Thar	0.0510753	0.22043	0.510753	0.0416667	0.176075		38	164	380	31	131
	744	57		Chamois	0.0456989	0.21371	0.538978	0.0416667	0.159946		34	159	401	31	119
	750	51		Deer	0.0226667	0.118667	0.817333	0.0346667	0.00666667		17	89	613	26	5
	743	58		Mustelids	0.736205	0.153432	0.00672948	0.00807537	0.0955585		547	114	5	6	71
	751	50		Rodents	0.821571	0.151798	0.00399467	0.00932091	0.0133156		617	114	3	7	10
Q16	791-841	18-68			1	2	3	4	5		1	2	3	4	5
1994	791	68		Possum	0.79	0.13	0.06	0.005	0.015		624.89	102.83	47.46	3.955	11.865
	826	33		Weta	0.43	0.155	0.18	0.085	0.15		355.18	128.03	148.68	70.21	123.9
	838	21		Bat	0.2	0.17	0.21	0.13	0.3		167.6	142.46	175.98	108.94	251.4
	833	26		Deer	0.045	0.125	0.275	0.195	0.36		37.485	104.125	229.075	162.435	299.88
	827	32		Takahe	0.01	0.03	0.075	0.135	0.75		8.27	24.81	62.025	111.645	620.25
	841	18		Kiwi	0.01	0.01	0.015	0.055	0.91		8.41	8.41	12.615	46.255	765.31
2012	703	98		Possum	0.789474	0.133713	0.0455192	0.0056899	0.0256046		555	94	32	4	18
	735	66		Weta	0.209524	0.136054	0.231293	0.171429	0.251701		154	100	170	126	185
	746	55		Bat	0.146113	0.124665	0.214477	0.170241	0.344504		109	93	160	127	257
	742	59		Deer	0.0754717	0.152291	0.291105	0.192722	0.28841		56	113	216	143	214
	736	65		Takahe	0.0163043	0.0203804	0.0720109	0.172554	0.71875		12	15	53	127	529
	749	52		Kiwi	0.00934579	0.00400534	0.00934579	0.0453939	0.931909		7	3	7	34	698
Q17					both	plants	horse	DK
1994	845	14			507	253	62	23
					nothing	control	eradicate	DK
2012	738	63		M	4	255	67	56
				F	1	235	83	37

## Sheet: Q18-20
	n	NR
Q18	788-821	38-71			1	2	3	4		1	2	3	4
1994	820	39		Rab-Pos	0.595	0.175	0.13	0.1		487.9	143.5	106.6	82
	821	38		Predator	0.235	0.385	0.285	0.095		192.935	316.085	233.985	77.995
	818	41		Wasp	0.21	0.23	0.29	0.27		171.78	188.14	237.22	220.86
	788	71		Herbivore	0.11	0.205	0.21	0.475		86.68	161.54	165.48	374.3
2012	777	24		Rab-Pos	0.338481	0.39897	0.185328	0.0772201		263	310	144	60
	778	23		Predator	0.557841	0.286632	0.100257	0.0552699		434	223	78	43
	775	26		Wasp	0.165161	0.196129	0.379355	0.259355		128	152	294	201
	742	59		Herbivore	0.0808625	0.103774	0.265499	0.549865		60	77	197	408
Q19					both	agri	cons	DK
1994	843	16		M	280	68	88	3
				F	291	46	65	2
2012	785	7		M	253	38	84	6
				F	263	36	99	6
Q20					comm	waste
1994	836	23		M	406	33
				F	384	13
2012	728	64		M	330	21
				F	363	14

## Sheet: Q21-24
	n	NR
Q21					Shoot	Poison	Dogs	Trap	Bio
1994	810	49		Deer	791	19
	810	49		Pig	605	26	179
	799	60		Goat	699	42	58
	804	55		Possum	162	418		146	78
	802	57		Rabbit	212	383		74	133
	795	64		Cat	212	351		159	73
				Mustelids		NA	NA	NA	NA
				Rodents		NA	NA	NA	NA
2012	730	69		Deer	722	8
	714	87		Pig	543	12	159
	725	76		Goat	656	15	54
	709	92		Possum	116	285		246	62
	715	86		Rabbit	193	279		119	124
	717	84		Cat	132	217		302	66
	696	105		Mustelids		291		328	77
	696	105		Rodents		364		250	82
Q22					yes	no	DK
1994	844	15		M	373	41	24
				F	369	23	14
2012	753	39		M	286	61	14
				F	347	23	22
Q23					yes	no	DK
1994	840	19		M	282	96	58
				F	153	168	83
2012	752	40		M	191	124	42
				F	126	176	93
Q24					yes	no	DK
1994	844	15		M	262	136	41
				F	181	169	55
2012	756	36		M	234	93	34
				F	201	121	73

## Sheet: Q25-29
	n	NR
Q25				M	F		M	F
1994	859	0		0.52	0.48		447	412
2012	792	9		0.48	0.52		383	408
Q26					<21	21-30	31-40	41-50	51-60	>60
1994	845	14		M	8.33333	68.0556	87	95.8333	69.4444	111.111
				F	9.72222	65.2778	105.556	80.5556	77.7778	66.6667
2012	790	2		M	7	44	51	66	76	139
				F	16	44	66	78	90	113
Q27				rural	urban		rural	urban
1994	838	21		0.74	0.26		218	620
2012	786	15		0.28	0.72		218	568
Q28				Euro	Maori	Euro/Maori	Poly	Asian	Other
1994	842	17		0.92	0.05	NA	0.02	NA	0.01		774.64	42.1	NA	16.84	NA	8.42
2012	792	9		0.888889	0.0454545	0.0151515	0.010101	0.0214646	0.0189394		704	36	12	8	17	15
Q29				<10k	10-20k	20-30k	30-40k
1994	NA	NA		NA	NA	NA	NA
				<20k	20-40k	40-60k	60-80k	>80k
2012	763	38		193	169	126	151	124
Island				North	South		North	South
1994	859	0		0.72	0.28		618	241
2012	795	6		0.73	0.27		579	216
Returns				1	2	3	4	5	6	7	8	9	10	>10
1994	859	0		424	235.772	81.3008	36.5854	28.4553	20.3252	20.3252	4.06504	4.06504	0	4.06504
2012	801	0		NA	NA	NA	NA	NA	NA	NA	NA	NA	NA	NA
