# Supplementary material
Source: publisher figshare collection journal article supplement (https://tandf.figshare.com/articles/dataset/_/1153754)
Supplement: Supplementary file 1 [file 2 › tnzr_a_944192_sm3548.docx]

Introduced wildlife in New Zealand 1994–2012: summary data notes

Data are presented by question split by year where n = number of responses and NR = non responses. Red numbers are percentages where they are the only available data from 1994 survey. Black numbers are counts (number of respondents) either available from 1994 and 2012. Blue numbers are calculated from 1994 percentages and rounded to 0 decimal places or estimated from graphics as accurately as possible (to nearest 0.5%). Where sample sizes from 1994 are highlighted in yellow, only ranges were available, and values were interpolated from regression on 2012 values (see Methods). Data are provided by gender where they were available from the 1994 survey. Results for age in 2012 highlighted yellow may be unreliable due to a typesetting error in presentation of age categories (not ordinal), which has been retained in the appendix for transparency. Other minor typographic errors in 1994 and 2012 print versions which do not affect interpretation have been corrected for the appendix version.

Where these data are cited or otherwise used please cite their source as:

Russell JC 2014. Environmental attitudes to introduced wildlife in New Zealand: 1994–2012. Journal of the Royal Society of New Zealand. doi:10.1080/03036758.2014.944192
